# Supplementary material for: Metal-free synthesis of poly(trimethylene carbonate) by efficient valorization of carbon dioxide
Source: Royal Society of Chemistry journal article supplement (doi:10.1039/c8gc03607a), 2019-01-01
Supplement: c8gc03607a1.pdf [file c8gc03607a1.pdf]

# Metal-free Synthesis of Poly(trimethylene carbonate) by Efficient Valorization of Carbon Dioxide

Jin Huang, Julien De Winter, Andrew P. Dove\*, Olivier Coulembier\*

## Table of Contents

|                                                      |   |
|------------------------------------------------------|---|
| <b>1. Experimental Section</b> .....                 | 2 |
| <b>2. Supporting Tables</b> .....                    | 3 |
| <b>3. Supporting <sup>1</sup>H NMR Spectra</b> ..... | 5 |
| <b>4. Reference</b> .....                            | 9 |

---

## 1. Experimental Section

### Materials and Methods

All reagents and solvents were purchased from Sigma-Aldrich, TCI, Air Liquide and used as received, unless otherwise noted. 1,8-Diazabicyclo[5.4.0]-undec-7-ene (DBU, 98%) and oxetane (97%) were distilled from CaH<sub>2</sub> and stored in a glove-box and glove-box freezer (-35 °C), respectively. 1,5,7-Triazabicyclo[4.4.0]dec-5-ene (TBD, 98%) was dried by anhydrous tetrahydrofuran (THF) three times before the storage in glove-box. N50 grade CO<sub>2</sub> (99.999%, H<sub>2</sub>O < 0.5 ppm) was used as received.

<sup>1</sup>H-NMR spectra were measured at 298 K using a 500 MHz advance Bruker spectrometer with tetramethylsilane (TMS) as an internal standard ( $\delta = 0.00$  ppm) in chloroform-d (CDCl<sub>3</sub>). Positive-ion MALDI-Mass Spectrometry (MALDI-MS) experiments were recorded using a Waters QToF Premier mass spectrometer equipped with a Nd:YAG (third harmonic) operating at 355 nm with a maximum output of 65  $\mu$ J delivered to the sample in 2.2 ns pulses at 50 Hz repeating rate. Time-of-flight mass analyses were performed in the reflectron mode at a resolution of about 10,000. All the samples were analyzed using trans-2-[3-(4-tert-butylphenyl)-2-methylprop-2-enylidene]malononitrile (DCTB) as matrix. That matrix was prepared as 40 mg·ml<sup>-1</sup> solution in CHCl<sub>3</sub>. The matrix solution (1  $\mu$ L) was applied to a stainless-steel target and air-dried. Polymer samples were dissolved in THF to obtain 1 mg·ml<sup>-1</sup> solutions and 50  $\mu$ L of 2 mg·ml<sup>-1</sup> NaI solution in acetonitrile has been added to the polymer solution. Therefore, 1  $\mu$ L of this solution was applied onto the target area already bearing the matrix crystals, and air-dried. For the recording of the single-stage MS spectra, the quadrupole (rf-only mode) was set to pass all the ions of the distribution, and they were transmitted into the pusher region of the time-of-flight analyzer where they were mass analyzed with 1s integration time. Data were acquired in continuum mode until acceptable averaged data were obtained. Size exclusion chromatography (SEC) was performed in THF at 308 K using a Polymer Laboratories liquid chromatograph equipped with a PL-DG802 degasser, an isocratic HPLC pump LC 1120 (flow rate = 1 mL min<sup>-1</sup>), a triple detector: refractive index (ERMA 7517), capillary viscometry and light scattering RALS (Viscotek T-60) (Polymer Laboratories GPC - RI/UV) and four columns: a PL gel 10  $\mu$ m guard column and three PL gel Mixed - B 10  $\mu$ m columns. Polystyrene (PS) standards were used for calibration.

### General Procedure for Polymer Synthesis

The CO<sub>2</sub>-based copolymers were synthesized following the general procedure. In brief, a 10 mL pressure reactor (Autoclave Suurmond BV, steel type 3/10 mL, 100 bar) with magnetic stirrer was dried in an oven at 70 °C overnight before immediately being taken into a N<sub>2</sub>-filled glove-box. After the reactor had cooled to ambient temperature, the reagents, I<sub>2</sub> (50 mg, 0.197 mmol), co-catalysts (see text) and oxetane (7.88 mmol, 0.512 mL) were charged to the vessel. The vessel was sealed, removed from the glove-box and before being placed in liquid nitrogen to cool down. CO<sub>2</sub> was condensed into the reactor while cold *via* a Schlenk-line until the appropriate pressure was achieved. The reactor was sealed again and heated to the desired temperature. After the allotted reaction time, the reactor was again cooled by liquid nitrogen before the CO<sub>2</sub> gas was released slowly. Aliquots of the polymerization mixture were taken for <sup>1</sup>H NMR spectroscopic characterization to determine overall conversion and selectivity. The residue of the mixture was dissolved in a small volume of THF (5 mL) and precipitated from methanol. The resultant copolymer was dried under vacuum at 40 °C overnight (Yield = 0.58 g, 0.125 mmol, 86%). When catalyst = TBD (0.197 mmol, 0.0274 g): <sup>1</sup>H NMR (500 MHz, CDCl<sub>3</sub>, 298K):  $\delta$  4.29 (t, 2H, <sup>3</sup>J<sub>HH</sub> = 6.0 Hz, -CH<sub>2</sub>), 4.23 (t, 4H, <sup>3</sup>J<sub>HH</sub> = 6.0 Hz, -OCH<sub>2</sub>), 3.73 (t, 2H, <sup>3</sup>J<sub>HH</sub> = 6.0 Hz, -CH<sub>2</sub>), 3.49 (t, 4H, <sup>3</sup>J<sub>HH</sub> = 6.3 Hz, -OCH<sub>2</sub>), 2.04 (quint, 2H, <sup>3</sup>J<sub>HH</sub> = 6.3 Hz, -CH<sub>2</sub>), 1.92 (quint, 2H, <sup>3</sup>J<sub>HH</sub> = 6.3 Hz, -CH<sub>2</sub>), 1.82 (quint, 2H, <sup>3</sup>J<sub>HH</sub> = 6.3 Hz, -CH<sub>2</sub>). SEC (THF):  $M_n = 4630$  g mol<sup>-1</sup>,  $D_M = 1.32$

## 2. Supporting Tables

Table S1. Copolymerization of oxetane and CO<sub>2</sub> with various catalysts. <sup>[a]</sup>

| Entry             | Catalyst                         | Time (h) | Pressure (MPa) | Oxetane Conversion (%) <sup>[b]</sup> | Selectivity (%) <sup>[b]</sup> |                    |                | TON   | TOF (h <sup>-1</sup> ) | M <sub>n</sub> (SEC) <sup>[c]</sup> g mol <sup>-1</sup> | D <sub>m</sub> <sup>[c]</sup> |
|-------------------|----------------------------------|----------|----------------|---------------------------------------|--------------------------------|--------------------|----------------|-------|------------------------|---------------------------------------------------------|-------------------------------|
|                   |                                  |          |                |                                       | TMC                            | Carbonate Linkages | Ether Linkages |       |                        |                                                         |                               |
| 1                 | DBU                              | 24       | 1              | 82                                    | 8                              | 72                 | 20             | 32.8  | 1.37                   | 1,360                                                   | 1.71                          |
| 2                 | MTBD                             | 24       | 1              | 46                                    | 11                             | 71                 | 18             | 18.4  | 0.77                   | 5,240                                                   | 1.35                          |
| 3                 | MTBD                             | 44       | 1              | 80                                    | 9                              | 73                 | 18             | 29.2  | 0.73                   | 6,000                                                   | 1.45                          |
| 4                 | TBD                              | 24       | 1              | 88                                    | <1                             | 88                 | 12             | 38.75 | 1.61                   | 4,630                                                   | 1.32                          |
| 5                 | P <sub>4</sub> - <i>tert</i> -Bu | 24       | 1              | 15                                    | >99                            | 0                  | 0              | 6     | 0.25                   | NA                                                      | NA                            |
| 6                 | P <sub>4</sub> - <i>tert</i> -Bu | 168      | 1              | 83                                    | 71                             | 19                 | 10             | 33.2  | 0.20                   | 320                                                     | 1.42                          |
| 7 <sup>[d]</sup>  | 1.3-bis-HFAB                     | 24       | 10             | 39                                    | 2                              | 98                 | <1             | 13    | 0.54                   | 1,000                                                   | 1.15                          |
| 8 <sup>[d]</sup>  | 1.3-bis-HFAB                     | 24       | 10             | 92                                    | 2                              | 98                 | <1             | 30.6  | 1.27                   | 2,000                                                   | 1.30                          |
| 9 <sup>[d]</sup>  | 1.3-bis-HFAB                     | 24       | 5              | 72                                    | 5                              | 95                 | <1             | 23.9  | 0.99                   | 1,500                                                   | 1.33                          |
| 10 <sup>[d]</sup> | 1.3-bis-HFAB                     | 24       | 2              | 25                                    | 4                              | 96                 | <1             | 8.32  | 0.35                   | <1,000                                                  | N.A                           |

<sup>[a]</sup> Copolymerization conditions: 7.88 mmol oxetane, 2.5 mol% I<sub>2</sub> and base cocatalyst, 1 MPa CO<sub>2</sub>, 105 °C. <sup>[b]</sup> Oxetane conversion and selectivity were determined from <sup>1</sup>H NMR spectroscopy of crude mixture; <sup>[c]</sup> Determined by SEC in tetrahydrofuran (THF) with polystyrene standard. <sup>[d]</sup> The results are based on the literature.<sup>[1]</sup>

Table S2. Coupling of CO<sub>2</sub> and oxetane using I<sub>2</sub>/P<sub>4</sub>-*tert*-Bu with various reaction time <sup>[a]</sup>.

| Entry | Reaction time / days | Selec. % |                    |                | Con. % <sup>[b]</sup> |
|-------|----------------------|----------|--------------------|----------------|-----------------------|
|       |                      | TMC      | Carbonate Linkages | Ether Linkages |                       |
| 1     | 1                    | >99      | 0                  | 0              | 15                    |
| 2     | 3                    | >99      | 0                  | 0              | 20                    |
| 3     | 5                    | >99      | 0                  | 0              | 30                    |
| 4     | 7                    | 71       | 19                 | 10             | 83                    |

<sup>[a]</sup> Coupling conditions: 7.88 mmol of oxetane, [M]<sub>0</sub>/[I<sub>2</sub>]<sub>0</sub>/[P<sub>4</sub>-*tert*-Bu] = 40/1/1, 3 MPa of CO<sub>2</sub>, at 105 °C. <sup>[b]</sup> Conversion and selectivity were determined from <sup>1</sup>H NMR spectroscopy of the product mixture.

**Table S3.** Optimization of coupling of CO<sub>2</sub> and oxetane using I<sub>2</sub>/TBD under different catalysts ratio <sup>[a]</sup>.

| Entry            | TBD loading mol% | Catalyst ratio/ I <sub>2</sub> :TBD | TMC | Selec. %           |                | Con. % <sup>[b]</sup> | M <sub>n SEC</sub> <sup>[c]</sup> g·mol <sup>-1</sup> | D <sub>M SEC</sub> <sup>[c]</sup> |
|------------------|------------------|-------------------------------------|-----|--------------------|----------------|-----------------------|-------------------------------------------------------|-----------------------------------|
|                  |                  |                                     |     | Carbonate Linkages | Ether Linkages |                       |                                                       |                                   |
| 1                | 1.25             | 2:1                                 | 2   | 71                 | 27             | 77                    | 4,150                                                 | 1.42                              |
| 2                | 2.5              | 1:2                                 | <1  | 85                 | 15             | 31                    | 5,000                                                 | 1.34                              |
| 3 <sup>[d]</sup> | 2.5              | 1:2                                 | 2   | 94                 | 4              | 51                    | 4,280                                                 | 1.47                              |
| 4                | 5                | 1:1                                 | <1  | 57                 | 43             | 97                    | 4,970                                                 | 1.32                              |
| 5                | 2.5              | 0:1                                 | 0   | 0                  | 0              | 0                     | 0                                                     | 0                                 |
| 6 <sup>[e]</sup> | 0                | 1:0                                 | 3   | 27                 | 70             | 44                    | 1,600                                                 | 1.53                              |

[a] Copolymerization conditions: 7.88 mmol of oxetane, 1 MPa of CO<sub>2</sub>, at 105 °C for 24 h. [b] Conversion and selectivity were determined from <sup>1</sup>H NMR spectroscopy of product mixture. [c] Determined by size-exclusion chromatography (SEC) in tetrahydrofuran (THF) with polystyrene standard. [d] CO<sub>2</sub> pressure is 3 MPa with 3 days. [e] The yield of oligomer is extremely low (3%).

**Table S4.** Copolymerization of CO<sub>2</sub> and oxetane using I<sub>2</sub>/TBD with initiators <sup>[a]</sup>.

| Entry            | Initiator        | TMC | Selec. %           |                | Con. % <sup>[b]</sup> | M <sub>n SEC</sub> <sup>[c]</sup> g·mol <sup>-1</sup> | D <sub>M SEC</sub> <sup>[c]</sup> |
|------------------|------------------|-----|--------------------|----------------|-----------------------|-------------------------------------------------------|-----------------------------------|
|                  |                  |     | Carbonate Linkages | Ether Linkages |                       |                                                       |                                   |
| 1                | BnOH             | <1  | 78                 | 22             | 72                    | 3,100                                                 | 1.56                              |
| 2                | BuOH             | 3   | 82                 | 15             | 55                    | 4,250                                                 | 1.33                              |
| 3 <sup>[d]</sup> | BnOH             | 2   | 80                 | 18             | 94                    | 3,830                                                 | 1.70                              |
| 4 <sup>[e]</sup> | H <sub>2</sub> O | 7   | 49                 | 44             | 65                    | 1,000                                                 | 1.79                              |

[a] Copolymerization conditions: 7.88 mmol of oxetane, [M]/[I<sub>2</sub>]<sub>0</sub>/[TBD]<sub>0</sub>/[Initiator]<sub>0</sub> = 100/2.5/2.5/1, 1 MPa of CO<sub>2</sub>, at 105 °C for 24 h. [b] Conversion and selectivity were determined from <sup>1</sup>H NMR spectroscopy of product mixture. [c] Determined by size-exclusion chromatography (SEC) in tetrahydrofuran (THF) with polystyrene standard. [d] 1 equivalent P<sub>4</sub>-*tert*-Bu is used to deprotonate BnOH in first to obtain alkoxide ion. [e] [M]/[I<sub>2</sub>]<sub>0</sub>/[TBD]<sub>0</sub>/[H<sub>2</sub>O]<sub>0</sub> = 100/2.5/2.5/1.25

**Table S5.** Polymerization of TMC initiated by the adduct of I<sub>2</sub>/oxetane. <sup>[a]</sup>

| Entry            | [TMC] <sub>0</sub> /[I <sub>2</sub> -oxetane] <sub>0</sub> | Con. <sup>[b]</sup> % |    |     | Selec. % <sup>[b]</sup> |                | M <sub>n SEC</sub> <sup>[c]</sup> g·mol <sup>-1</sup> | D <sub>M SEC</sub> <sup>[c]</sup> |
|------------------|------------------------------------------------------------|-----------------------|----|-----|-------------------------|----------------|-------------------------------------------------------|-----------------------------------|
|                  |                                                            | TMC                   | EP | TMC | Carbonate linkages      | Ether linkages |                                                       |                                   |
| 1                | 40                                                         | >99                   | 50 | <1  | 94                      | 6              | 5,870                                                 | 1.67                              |
| 2                | 80                                                         | >99                   | 80 | <1  | 98                      | 2              | 10,000                                                | 1.84                              |
| 3 <sup>[d]</sup> | 40                                                         | >99                   | 83 | <1  | >99                     | <1             | 4,300                                                 | 1.53                              |

[a] Copolymerization conditions: 197 μmol of I<sub>2</sub>/oxetane adduct (2.5mol%), [M]/[C] = 40/1, 1 MPa of N<sub>2</sub>, at 105 °C for 24 h. [b] Conversion and selectivity were determined from <sup>1</sup>H NMR spectroscopy of product mixture. [c] Determined by size-exclusion chromatography (SEC) in tetrahydrofuran (THF) with polystyrene standard. [d] Experiment was carried out at 1MPa of CO<sub>2</sub> at 105 °C for 24 h.

### 3. Supporting $^1\text{H}$ NMR Spectra

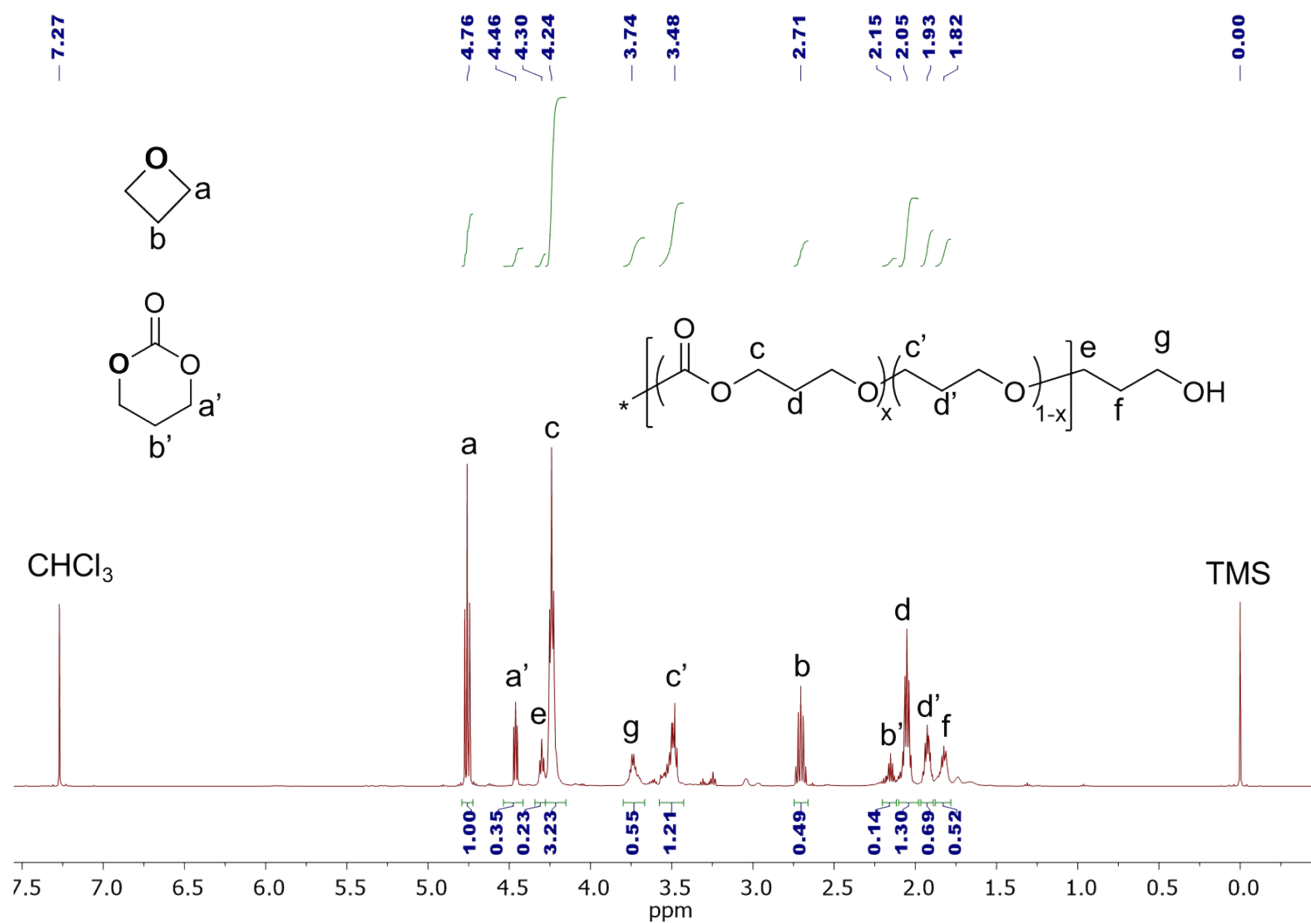

**Figure S1.**  $^1\text{H}$  NMR spectrum (CDCl<sub>3</sub>, 500 MHz) of the resultant mixture of polymerization (Table 1, entry 1). Conditions: 7.88 mmol oxetane,  $[\text{I}_2]_0/[\text{DBU}]_0/[\text{EP}]_0 = 1/1/40$ , 1 MPa CO<sub>2</sub>, 105 °C, 24h.

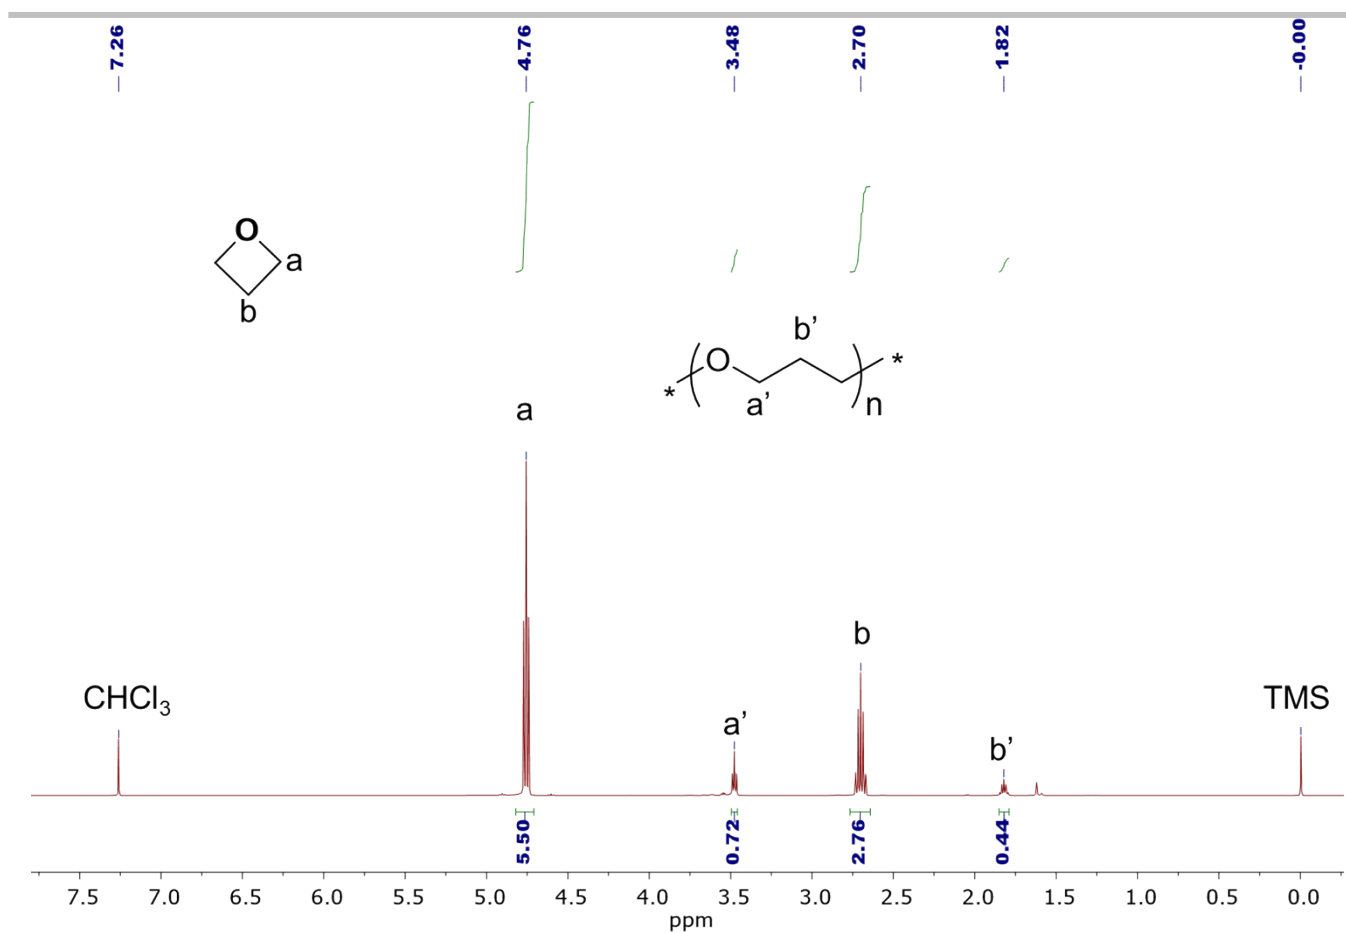

**Figure S2.**  $^1\text{H}$  NMR spectrum ( $\text{CDCl}_3$ , 500 MHz) of the resultant mixture of oligomerization. Conditions: 7.88 mmol oxetane,  $[\text{I}_2]_0/[\text{EP}]_0 = 1/40$ , 0.1 MPa  $\text{N}_2$ , 105  $^\circ\text{C}$ , 8 minutes.

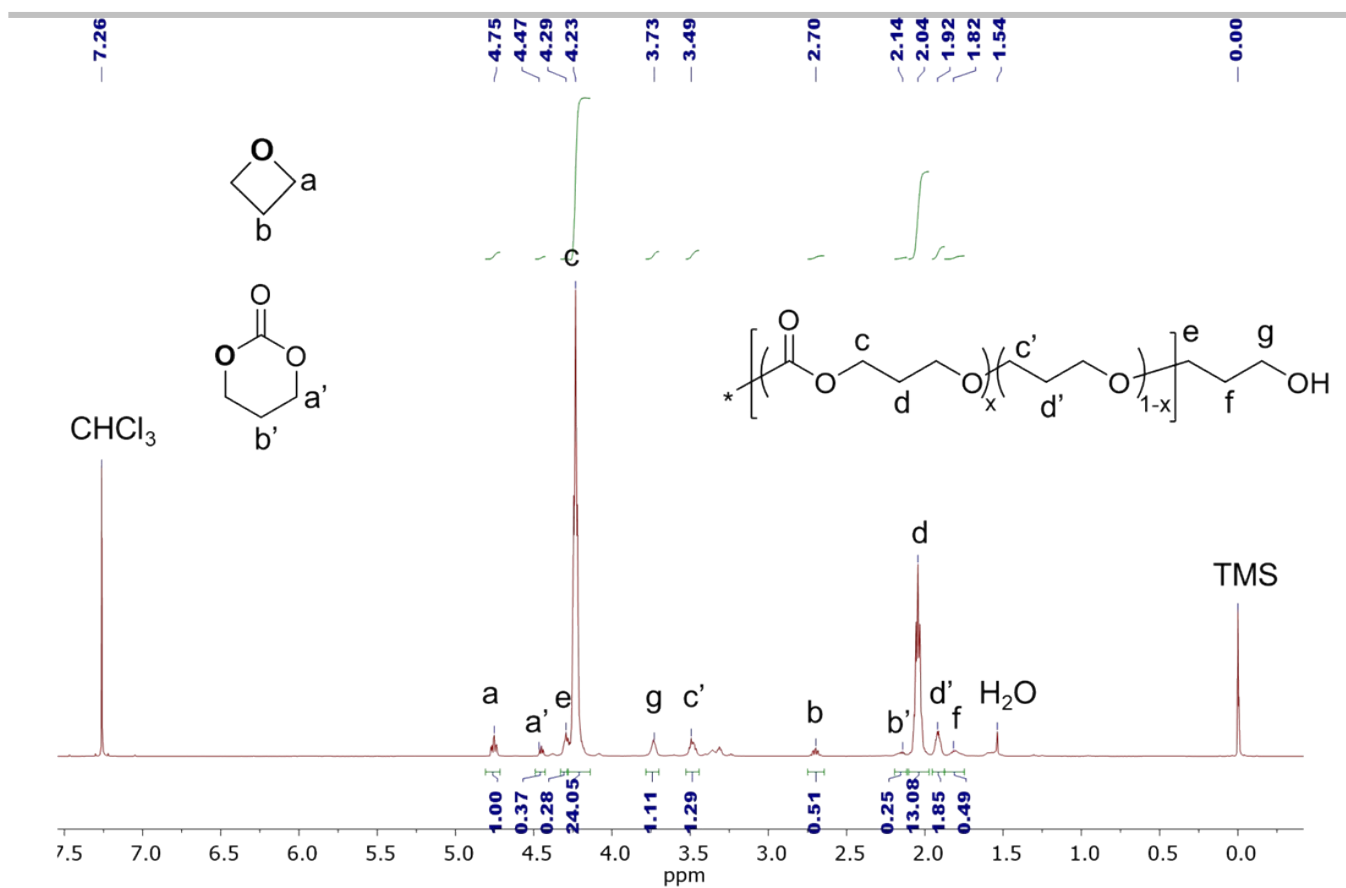

**Figure S3.** <sup>1</sup>H NMR spectrum (CDCl<sub>3</sub>, 500 MHz) of the resultant mixture of polymerization (Table 2, entry 3) Conditions: 7.88 mmol oxetane, [I<sub>2</sub>]<sub>0</sub>/[TBD]<sub>0</sub>/[EP] = 1/1/40, 3 MPa CO<sub>2</sub>, 105 °C, 7 days.

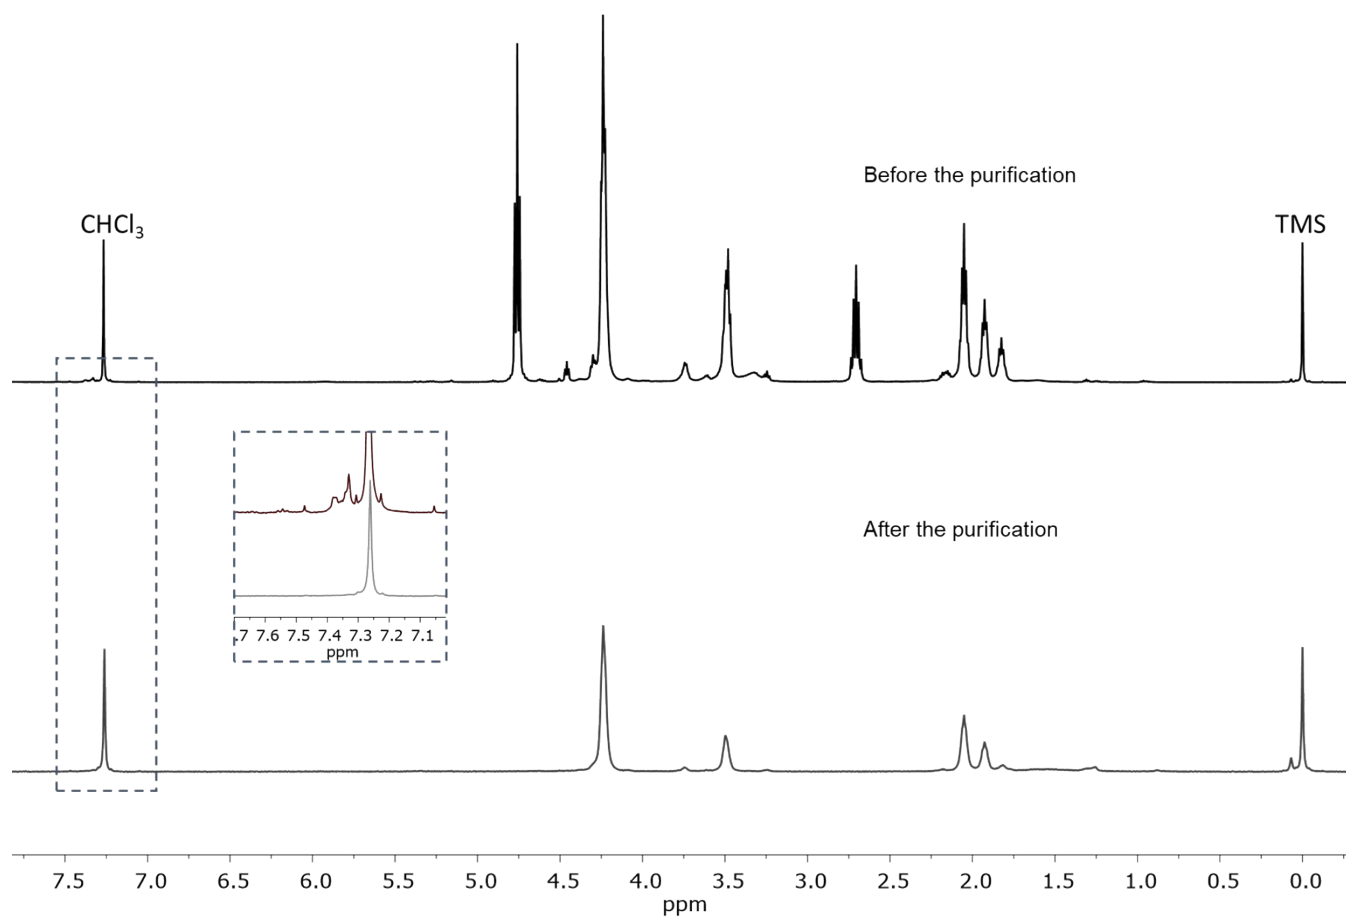

**Figure S4.** <sup>1</sup>H NMR spectrum (CDCl<sub>3</sub>, 500 MHz) of copolymer before and after the precipitation from methanol (Table S3, entry 1). Conditions: 7.88 mmol of oxetane, [M]/[I<sub>2</sub>]<sub>0</sub>/[TBD]<sub>0</sub>/[BnOH]<sub>0</sub> = 100/2.5/2.5/1, 1 MPa of CO<sub>2</sub>, at 105 °C for 24 h.



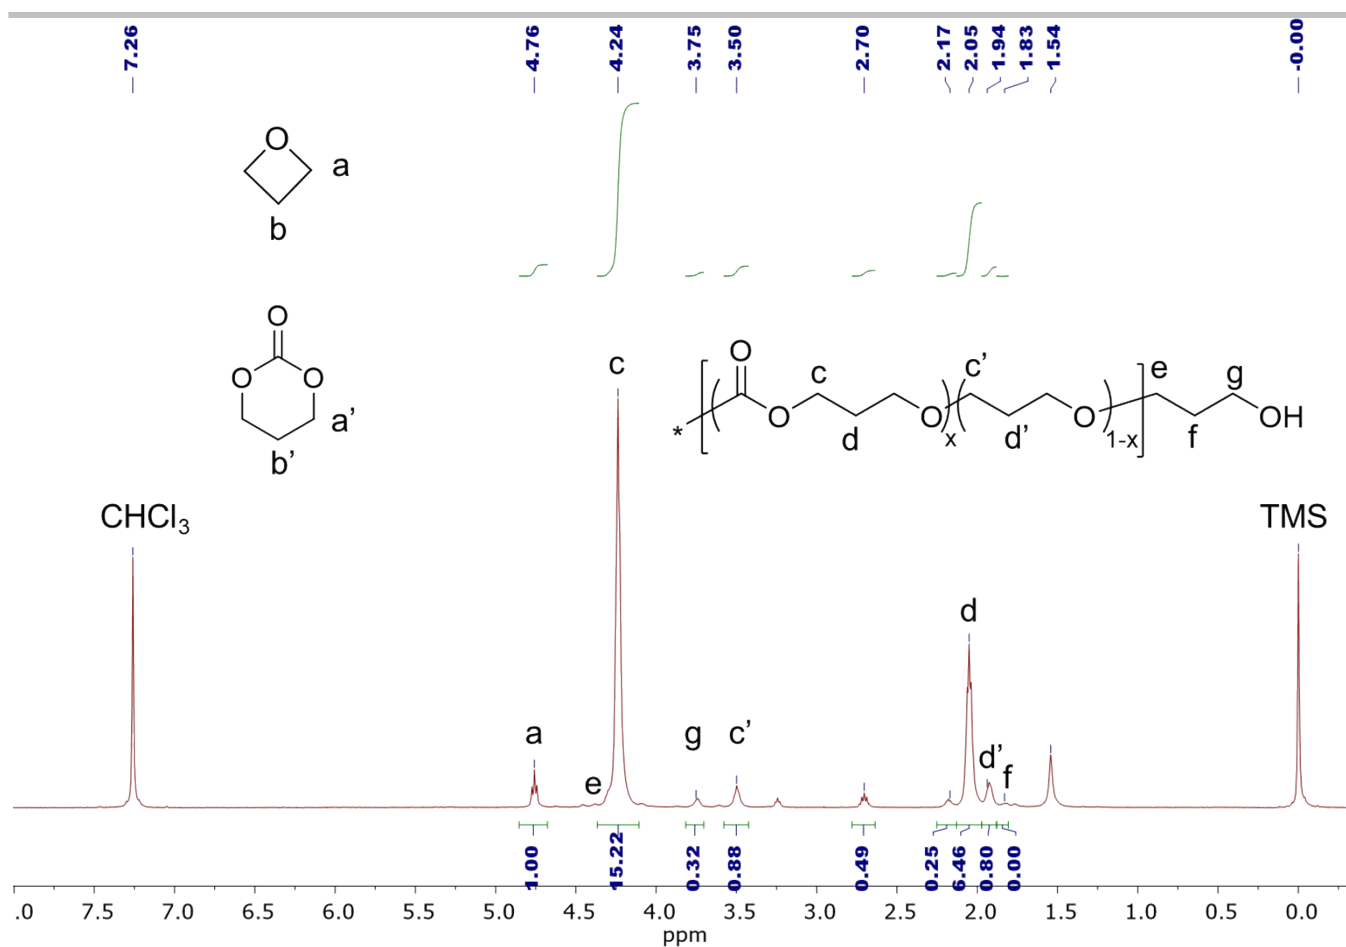

**Figure S5.**  $^1\text{H}$  NMR spectrum ( $\text{CDCl}_3$ , 500 MHz) of the resultant mixture of polymerization (Table S4, entry 1). Copolymerization conditions: 197  $\mu\text{mol}$  of  $\text{I}_2/\text{oxetane}$  adduct (2.5mol%),  $[\text{TMC}]_0/[\text{Initiator}] = 40/1$ , 1 MPa of  $\text{N}_2$ , at 105 $^\circ\text{C}$  for 24 h.

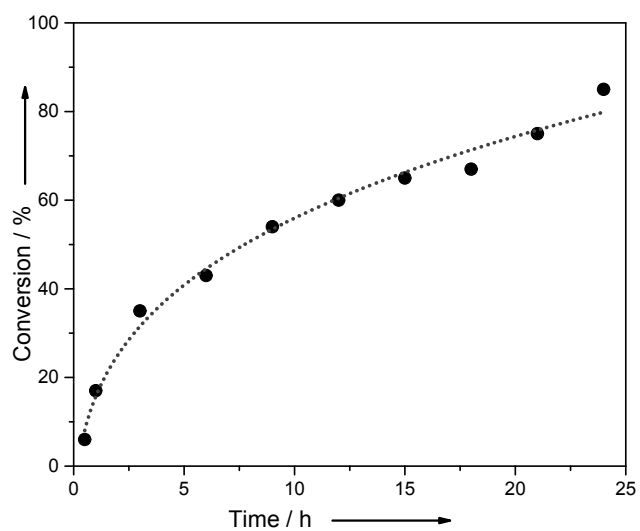

**Figure S6.** Chart of conversion of oxetane against time. Conditions of reaction: Copolymerization conditions: 197  $\mu\text{mol}$  of  $\text{I}_2$  (2.5 mol%), 7.88 mmol of oxetane,  $[\text{M}]/[\text{I}_2]_0/[\text{TBD}]_0 = 40/1/1$ , 1 MPa of  $\text{CO}_2$ , at 105 $^\circ\text{C}$ .

#### 4. Reference

- 
- [1] M. Alves, B. Grignard, A. Boyaval, R. Méreau, J. De Winter, P. Gerbaux, C. Detrembleur, T. Tassaing, C. Jérôme, *ChemSusChem* **2017**, *10*, 1128-1138.
